# Supplementary material
Source: PubMed Central journal article supplement (PMC2529467)
Supplement: NIHMS62605-supplement-1File002.pdf [file NIHMS62605-supplement-1File002.pdf]

Oxyanion thioacyl @MP2/6-311(2df,2p)

|   |           |           |          |
|---|-----------|-----------|----------|
| H | 0.020162  | 0.182997  | 0.131637 |
| C | -0.058074 | -0.042362 | 1.211375 |
| O | 1.011141  | -0.056960 | 1.915937 |
| C | -0.971602 | -1.233585 | 1.440388 |
| H | -0.428789 | -2.147645 | 1.187847 |
| F | -2.112989 | -1.208888 | 0.625476 |
| H | -1.291233 | -1.256936 | 2.479551 |
| S | -1.346306 | 1.565598  | 1.707982 |
| C | -0.195789 | 2.293850  | 2.887308 |
| H | 0.659089  | 1.600903  | 2.913917 |
| H | -0.636298 | 2.370899  | 3.879933 |
| H | 0.139593  | 3.279817  | 2.568872 |

Oxyanion thioacyl @PM3

|   |           |           |           |
|---|-----------|-----------|-----------|
| H | -0.587023 | 0.325556  | -0.102980 |
| C | -0.226651 | 0.128008  | 0.927595  |
| O | 1.026065  | 0.132667  | 1.108971  |
| C | -1.030118 | -1.008004 | 1.629266  |
| H | -0.669399 | -1.203107 | 2.651203  |
| F | -0.918671 | -2.188489 | 0.951323  |
| H | -2.107495 | -0.780174 | 1.674943  |
| S | -1.146888 | 1.811830  | 1.824194  |
| C | 0.400770  | 2.456177  | 2.461594  |
| H | 1.188396  | 1.728734  | 2.131188  |
| H | 0.418463  | 2.521188  | 3.552272  |
| H | 0.645823  | 3.443380  | 2.062351  |

alpha-hydroxy sulfide @MP2/6-311(2df,2p)

|   |           |           |           |
|---|-----------|-----------|-----------|
| H | -0.002543 | 0.002009  | -0.001903 |
| C | 0.008751  | -0.001011 | 1.091356  |
| O | 1.326445  | -0.006202 | 1.604603  |
| C | -0.586901 | -1.300812 | 1.589762  |
| H | 0.037570  | -2.127188 | 1.255111  |
| F | -1.856383 | -1.472157 | 1.078401  |
| H | -0.638707 | -1.307738 | 2.676186  |
| S | -0.930015 | 1.478540  | 1.533055  |
| C | -1.005196 | 1.280772  | 3.327995  |
| H | -1.753602 | 0.548161  | 3.614930  |
| H | -1.285962 | 2.247779  | 3.735486  |
| H | -0.030165 | 1.004187  | 3.719023  |
| H | 1.710467  | 0.856986  | 1.418177  |

alpha-hydroxy sulfide @PM3

|   |           |           |           |
|---|-----------|-----------|-----------|
| H | -0.288706 | 0.219627  | -0.051305 |
| C | -0.146166 | 0.042921  | 1.042355  |
| O | 1.218024  | -0.078494 | 1.345701  |
| C | -0.798737 | -1.296196 | 1.457235  |
| H | -0.576716 | -1.553746 | 2.507345  |
| F | -0.348454 | -2.324773 | 0.694984  |

|   |           |           |          |
|---|-----------|-----------|----------|
| H | -1.892929 | -1.249598 | 1.325053 |
| S | -1.019213 | 1.494767  | 1.812734 |
| C | -0.737906 | 1.327414  | 3.583711 |
| H | -1.147552 | 0.397495  | 3.994565 |
| H | -1.242762 | 2.165984  | 4.078922 |
| H | 0.323432  | 1.367796  | 3.852859 |
| H | 1.651329  | 0.690086  | 0.998022 |

Methythiolate-Nicotinamide @MP2/6-311(2df,2p)

|   |           |           |           |
|---|-----------|-----------|-----------|
| N | 0.000000  | 0.000000  | 0.000000  |
| C | 0.000000  | 0.000000  | 1.383895  |
| C | 1.138410  | 0.000000  | 2.104681  |
| C | 2.475395  | -0.136930 | 1.466330  |
| C | 2.387773  | 0.199566  | 0.014641  |
| C | 1.193219  | 0.204418  | -0.629106 |
| S | 3.136513  | -1.858609 | 1.767225  |
| C | 1.936077  | -2.778098 | 0.786570  |
| C | 3.576846  | 0.500234  | -0.819363 |
| O | 3.497523  | 1.016846  | -1.928574 |
| C | -1.247483 | 0.212183  | -0.711329 |
| N | 4.779579  | 0.201368  | -0.233494 |
| H | 2.189736  | -3.830974 | 0.877908  |
| H | -0.974792 | 0.029078  | 1.850414  |
| H | 1.072694  | 0.018102  | 3.182965  |
| H | 3.224604  | 0.475412  | 1.971941  |
| H | 1.162255  | 0.405570  | -1.691796 |
| H | 4.798939  | -0.558116 | 0.431557  |
| H | 5.578274  | 0.297273  | -0.839829 |
| H | 0.932307  | -2.615137 | 1.174608  |
| H | 1.985721  | -2.483695 | -0.259434 |
| H | -2.019412 | -0.426149 | -0.288918 |
| H | -1.110634 | -0.056642 | -1.754260 |
| H | -1.572646 | 1.252094  | -0.651959 |

Methythiolate-Nicotinamide @PM3

|   |           |           |           |
|---|-----------|-----------|-----------|
| C | 0.046590  | -0.135411 | -0.032626 |
| C | 0.094845  | -0.049149 | 1.449517  |
| C | 1.492106  | -0.077220 | 1.971433  |
| C | 2.532365  | -0.436631 | 1.178518  |
| N | 2.346227  | -0.847177 | -0.163006 |
| C | 1.103067  | -0.494751 | -0.777328 |
| S | -1.014970 | -1.344981 | 2.195749  |
| C | -0.263258 | -2.926945 | 1.780388  |
| C | 1.792297  | 0.351132  | 3.364691  |
| O | 2.933916  | 0.526956  | 3.783999  |
| N | 0.732237  | 0.661031  | 4.252381  |
| H | -0.889560 | -3.714873 | 2.216025  |
| H | 1.059333  | -0.575583 | -1.870943 |
| H | -0.913583 | 0.100344  | -0.506211 |
| H | -0.413649 | 0.894359  | 1.770752  |
| H | 3.567160  | -0.455434 | 1.557711  |
| H | -0.096365 | 0.122891  | 4.103043  |
| H | 0.995543  | 0.716351  | 5.211187  |
| H | -0.208197 | -3.099669 | 0.699715  |
| H | 0.749074  | -3.037907 | 2.184688  |
| C | 3.539265  | -0.837057 | -1.037106 |

|   |          |           |           |
|---|----------|-----------|-----------|
| H | 3.331941 | -1.417812 | -1.945865 |
| H | 4.385527 | -1.306475 | -0.517562 |
| H | 3.839407 | 0.177321  | -1.337764 |

Thioacyl backbone(proton on amide) @MP2/6-311(2df,2p)

|   |           |           |           |
|---|-----------|-----------|-----------|
| C | -0.000142 | -0.000581 | 0.000108  |
| C | -0.000504 | -0.001234 | 1.513958  |
| N | 1.217065  | 0.003618  | 2.063311  |
| C | 1.390171  | 0.016967  | 3.493619  |
| C | 2.860409  | -0.179559 | 3.827542  |
| S | 3.938396  | 1.153180  | 3.231512  |
| C | 4.463629  | 0.340507  | 1.503012  |
| C | 5.452879  | 1.369019  | 0.956098  |
| O | -1.061566 | -0.011040 | 2.158952  |
| O | 3.466253  | 0.052321  | 0.705226  |
| H | 5.020198  | -0.533005 | 1.903037  |
| H | 5.873343  | 0.974925  | 0.030062  |
| H | 6.260429  | 1.582045  | 1.658324  |
| H | 4.918964  | 2.289078  | 0.722701  |
| H | 2.090021  | 0.032210  | 1.462821  |
| H | 1.008792  | 0.019497  | -0.405405 |
| H | -0.555302 | 0.868433  | -0.347921 |
| H | -0.524027 | -0.887812 | -0.351021 |
| H | 0.787123  | -0.778254 | 3.942115  |
| H | 1.037233  | 0.961755  | 3.915580  |
| H | 3.215446  | -1.116723 | 3.391312  |
| H | 2.977926  | -0.248107 | 4.909554  |

Thioacyl backbone(proton on amide) @PM3

|   |           |           |           |
|---|-----------|-----------|-----------|
| C | 2.596831  | 1.835795  | -0.159853 |
| C | 2.409491  | 0.342027  | -0.281537 |
| O | 3.212145  | -0.379981 | -0.877664 |
| N | 1.313228  | -0.208770 | 0.402323  |
| C | 0.870298  | -1.586120 | 0.073783  |
| C | -0.490850 | -1.888829 | 0.686545  |
| S | -1.904770 | -1.088888 | -0.125940 |
| C | -1.982862 | 0.889555  | 0.612724  |
| O | -0.867103 | 1.493076  | 0.715635  |
| C | -2.983894 | 1.443099  | -0.405100 |
| H | -2.452525 | 0.605091  | 1.579943  |
| H | -3.449740 | 2.359915  | -0.019007 |
| H | -3.789882 | 0.727796  | -0.615993 |
| H | -2.505968 | 1.697643  | -1.359164 |
| H | 0.539309  | 0.442400  | 0.581339  |
| H | 1.715206  | 2.373676  | -0.535896 |
| H | 3.470746  | 2.184548  | -0.724178 |
| H | 2.738213  | 2.129438  | 0.888614  |
| H | 1.634801  | -2.283900 | 0.472974  |
| H | 0.845219  | -1.744004 | -1.024724 |
| H | -0.491561 | -1.633754 | 1.763203  |
| H | -0.660100 | -2.979980 | 0.633787  |

Thioacyl backbone(proton on thioacyl) @MP2/6-311(2df,2p)

|   |           |           |           |
|---|-----------|-----------|-----------|
| C | 0.011558  | -0.011811 | -0.002258 |
| C | 0.001268  | -0.013447 | 1.518746  |
| O | 1.102640  | -0.069491 | 2.121585  |
| N | -1.212989 | 0.052488  | 2.062461  |
| C | -1.232109 | 0.047291  | 3.506329  |
| C | -2.513451 | 0.674613  | 4.030795  |
| S | -4.053109 | -0.221306 | 3.663613  |
| C | -4.317593 | 0.250034  | 1.892844  |
| O | -3.504128 | -0.405953 | 0.998232  |
| C | -5.767167 | -0.053440 | 1.564800  |
| H | -4.146070 | 1.336441  | 1.886762  |
| H | -5.948478 | 0.199722  | 0.521255  |
| H | -6.448649 | 0.508893  | 2.200141  |
| H | -5.954036 | -1.118698 | 1.692736  |
| H | -2.523865 | -0.239901 | 1.340838  |
| H | -0.992807 | 0.023128  | -0.418264 |
| H | 0.522734  | -0.906824 | -0.355599 |
| H | 0.583231  | 0.847208  | -0.353238 |
| H | -0.378852 | 0.610848  | 3.902434  |
| H | -1.144491 | -0.970882 | 3.907208  |
| H | -2.481579 | 0.740024  | 5.120512  |
| H | -2.617653 | 1.688240  | 3.637505  |

Thioacyl backbone(proton on thioacyl) @PM3

|   |           |           |           |
|---|-----------|-----------|-----------|
| C | 3.035479  | 1.169693  | 0.613780  |
| C | 2.429788  | -0.120462 | 0.087904  |
| O | 3.162367  | -0.992315 | -0.431424 |
| N | 1.078506  | -0.215854 | 0.224297  |
| C | 0.388867  | -1.411061 | -0.264318 |
| C | -0.881293 | -1.646683 | 0.548917  |
| S | -2.346002 | -0.622106 | 0.142393  |
| C | -1.798717 | 1.188411  | 0.182356  |
| O | -0.795195 | 1.515429  | 1.076610  |
| C | -1.481464 | 1.637911  | -1.241838 |
| H | -2.698028 | 1.710736  | 0.575761  |
| H | -1.264683 | 2.714012  | -1.275159 |
| H | -2.325709 | 1.446301  | -1.915659 |
| H | -0.603676 | 1.113136  | -1.645907 |
| H | 0.005217  | 0.992897  | 0.830272  |
| H | 2.377182  | 1.692866  | 1.319866  |
| H | 3.240146  | 1.858190  | -0.216434 |
| H | 3.988164  | 0.982395  | 1.125492  |
| H | 1.022740  | -2.320711 | -0.191546 |
| H | 0.141954  | -1.289290 | -1.340043 |
| H | -1.243392 | -2.680109 | 0.392466  |
| H | -0.668428 | -1.543665 | 1.628361  |
